# Supplementary material for: Deletions of Chromosome 7q Affect Nuclear Organization and HLXB9Gene Expression in Hematological Disorders
Source: MDPI journal article supplement (doi:10.3390/cancers11040585), 2019-04-25
Supplement: s1 [file s1]

## Supplementary figures:

**Table S1. Phenotypic characterisation for del(7q) samples with high *HLXB9* expression levels.**

|                 |         |              |        |                                                        | FISH test component percentage value | OS.time | OS | OS.unit | AML cytogenetics risk category | Age at diagnosis | Cytogenetic abnormality                                                                                | Other cytogenetic abnormality | Molecular Analysis Abnormality Testing Result                                                                                          |
|-----------------|---------|--------------|--------|--------------------------------------------------------|--------------------------------------|---------|----|---------|--------------------------------|------------------|--------------------------------------------------------------------------------------------------------|-------------------------------|----------------------------------------------------------------------------------------------------------------------------------------|
| Sample          | HLXB9   | Primary site | Gender | FISH test component                                    |                                      |         |    |         |                                |                  |                                                                                                        |                               |                                                                                                                                        |
| TCGA-AB-2847-03 | 12.0594 | WBC          | Male   | CBF-Beta]-7 or del(7q)                                 | 0 63                                 | 608     |    | 1 days  | Intermediate/Normal            |                  | 53 Normal del (7q) / 7q-                                                                               | NA                            | FLT3 Mutation Negative IDH1 R132 Negative IDH1 R140 Negative IDH1 R172 Negative Activating RAS Negative NPMc Negative                  |
| TCGA-AB-2860-03 | 1.1759  | WBC          | Female | NA                                                     | NA                                   | 427     |    | 1 days  | Poor                           |                  | 60 Complex (greater than or equal to 3 distinct abnormalities) del (5q) / 5q- del (7q) / 7q-           | t(4;11)                       | FLT3 Mutation Negative IDH1 R132 Negative IDH1 R140 Negative IDH1 R172 Negative Activating RAS Negative NPMc Negative                  |
| TCGA-AB-2894-03 | 1.4395  | WBC          | Female | BCR-ABL PML-RAR MLL CBF-Beta TEL-AML 1 +8 7 or del(7q) | 0 0 74 0 0 0 76                      | 181     |    | 1 days  | Poor                           |                  | 50 Normal del (7q) / 7q- t (9;11)                                                                      | NA                            | FLT3 Mutation Negative IDH1 R132 Negative IDH1 R140 Negative IDH1 R172 Negative Activating RAS Negative NPMc Negative                  |
| TCGA-AB-2917-03 | 2.697   | WBC          | Female | NA                                                     | NA                                   | 1216    |    | 0 days  | Poor                           |                  | 41 Normal Complex (greater than or equal to 3 distinct abnormalities) del (7q) / 7q-                   | NA                            | FLT3 Mutation Negative IDH1 R132 Negative IDH1 R140 Negative IDH1 R172 Negative Activating RAS Positive NPMc Negative                  |
| TCGA-AB-2935-03 | 2.0142  | WBC          | Male   | -7 or del(7q)                                          | 45                                   | 61      |    | 1 days  | Poor                           |                  | 66 del (5q) / 5q- del (7q) / 7q-                                                                       | NA                            | BCR-ABL Negative FLT3 Mutation Negative IDH1 R132 Negative IDH1 R140 Negative IDH1 R172 Negative Activating RAS Negative NPMc Negative |
| TCGA-AB-2952-03 | 1.8336  | WBC          | Female | BCR-ABL PML-RAR +8                                     | 0 0 38                               | 31      |    | 1 days  | Poor                           |                  | 60 Complex (greater than or equal to 3 distinct abnormalities) del (5q) / 5q- del (7q) / 7q- Trisomy 8 | NA                            | FLT3 Mutation Negative IDH1 R132 Negative IDH1 R140 Negative IDH1 R172 Negative Activating RAS Negative NPMc Negative                  |
| TCGA-AB-2987-03 | 1.4362  | WBC          | Female | BCR-ABL PML-RAR MLL CBF-Beta AML1-ETO +8 7 or del(7q)  | 0 0 0 0 0 0 0                        | 184     |    | 1 days  | Intermediate/Normal            |                  | 75 Normal del (7q) / 7q-                                                                               | NA                            | FLT3 Mutation Negative IDH1 R132 Negative IDH1 R140 Negative IDH1 R172 Negative Activating RAS Positive NPMc Positive                  |

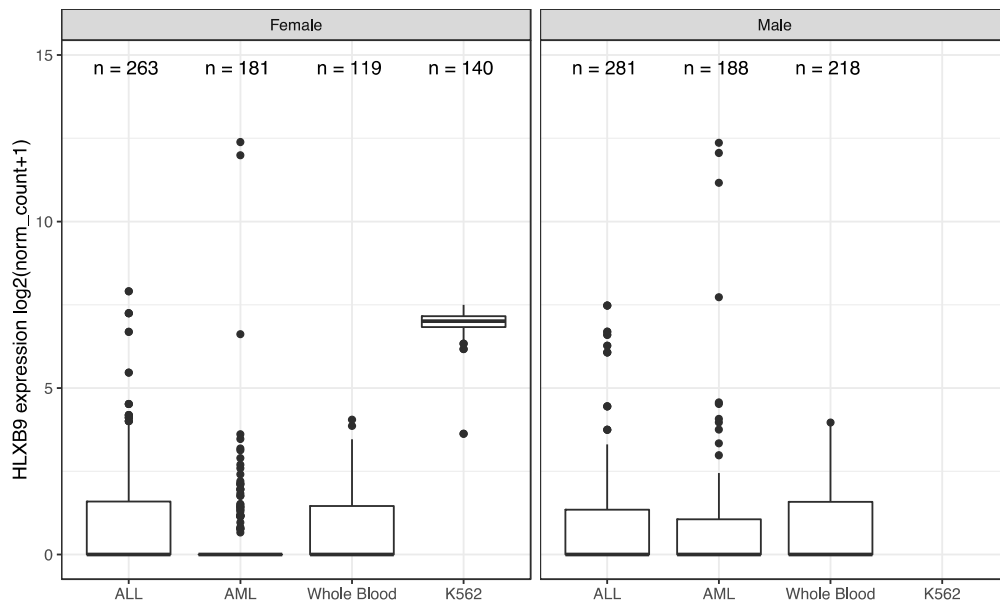

**Figure S1. Distribution of *HLXB9* expression levels across datasets stratified by gender. "n" represents the number of samples in each category. The relationship between *HLXB9* expression and gender was analysed for all cohorts. We observed that there was no significant difference in the *HLXB9* expression levels between male and female samples.**

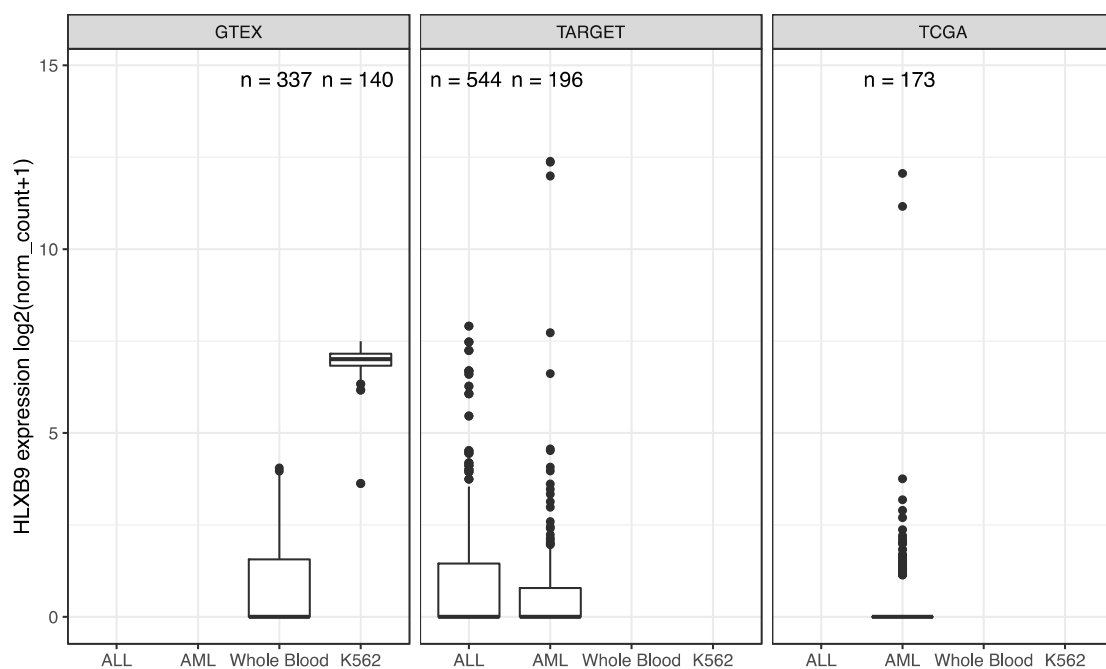

Figure S2. *HLXB9* expression levels in AML, ALL, Whole Blood and Leukemia Cell Line differentiated per dataset of origin: GTEX, TARGET and TCGA.

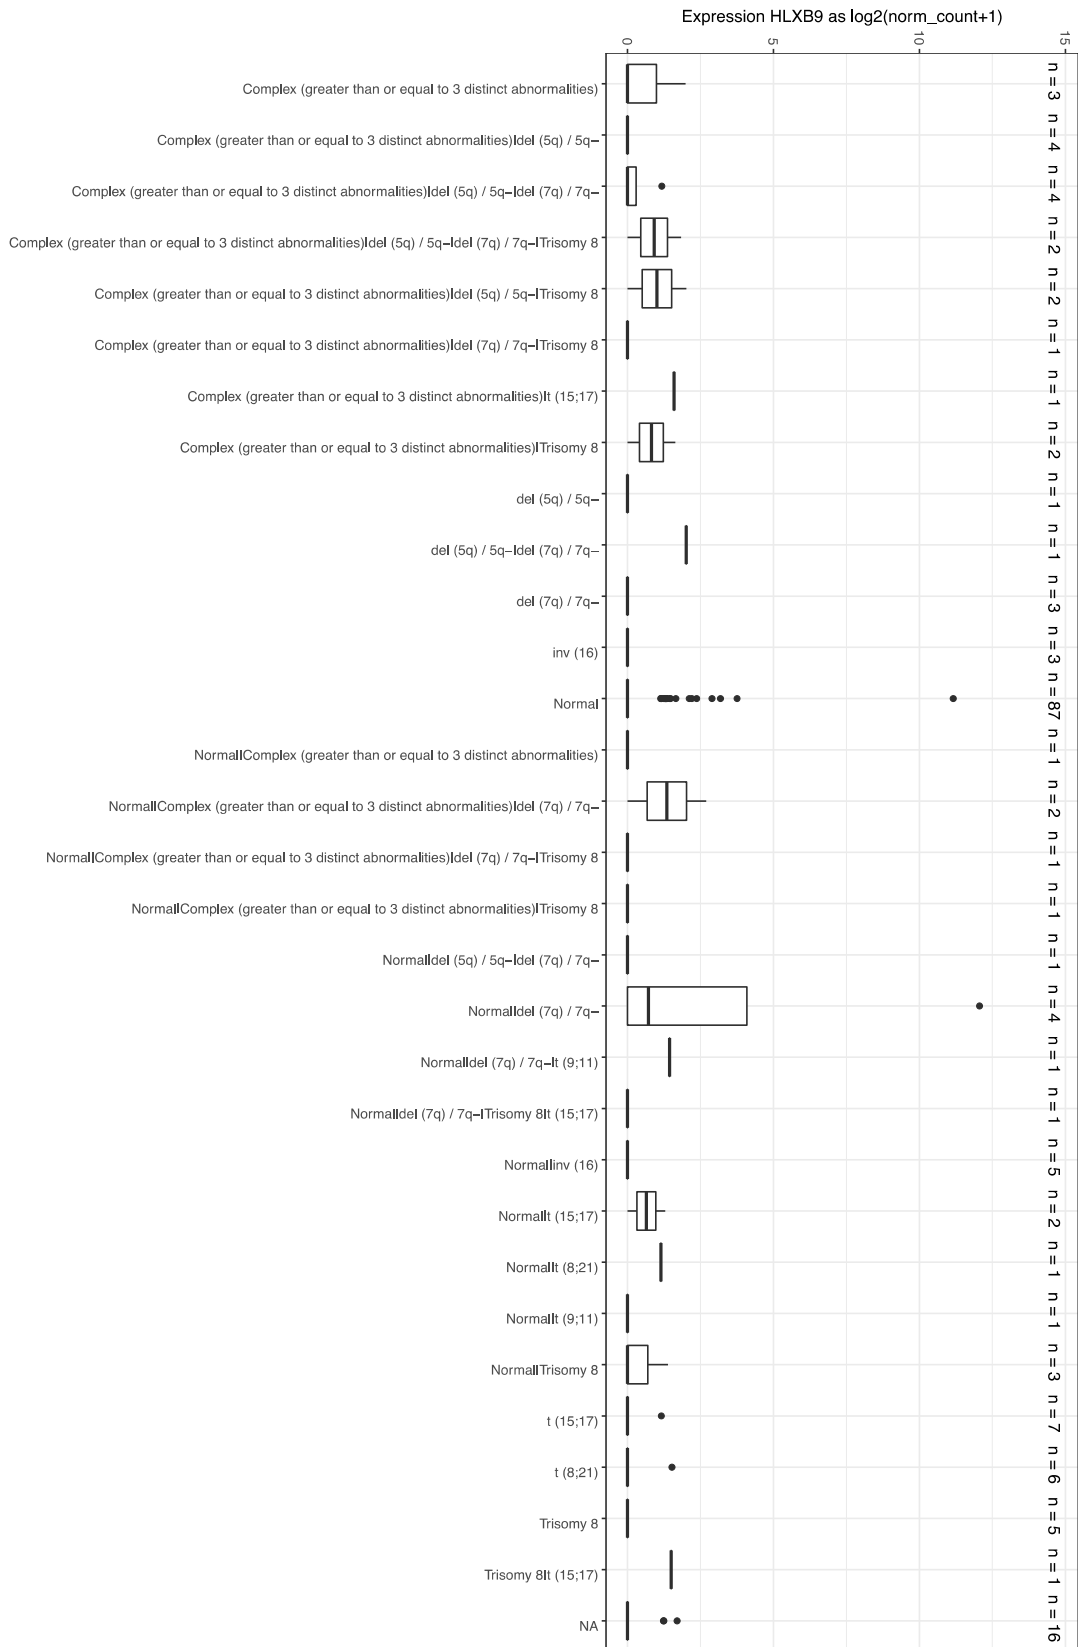

**Figure S3. Distribution of HLXB9 expression levels in TCGA AML data stratified per cytogenetic phenotype. "n" signifies the number of samples in each class.**
